# Supplementary material for: Enhancing mung bean hydration using the ultrasound technology: description of mechanisms and impact on its germination and main components
Source: PubMed Central journal article supplement (PMC5171542; doi:10.1038/srep38996), 2016-12-19
Supplement: srep38996-s1.pdf [file srep38996-s1.pdf]

## SUPPLEMENTARY INFORMATION

### Enhancing mung bean hydration using the ultrasound technology: description of mechanisms and impact on its germination and main components

*Alberto Claudio Miano, Jessica da Costa Pereira, Nanci Castanha, Manoel Divino da Matta Júnior and Pedro Esteves Duarte Augusto\**

**Table.** Analysis of the starch extracted from mung beans hydrated conventionally and with ultrasound (mean values  $\pm$  standard deviation). The letters next to the values represent the mean comparison test ( $p < 0.05$ )

| <b>RVA Analysis</b>              | <b>Conventional hydration</b> | <b>Ultrasound</b>           |
|----------------------------------|-------------------------------|-----------------------------|
| Peak 1 (mPa.s)                   | 6520 $\pm$ 107 <sup>a</sup>   | 6321 $\pm$ 84 <sup>a</sup>  |
| Trough 1 (mPa.s)                 | 2634 $\pm$ 16 <sup>a</sup>    | 2436 $\pm$ 26 <sup>a</sup>  |
| Breakdown (mPa.s)                | 3886 $\pm$ 123 <sup>a</sup>   | 3885 $\pm$ 58 <sup>a</sup>  |
| Final apparent viscosity (mPa.s) | 4187 $\pm$ 7 <sup>a</sup>     | 4115 $\pm$ 182 <sup>a</sup> |
| Setback (mPa.s)                  | 1553 $\pm$ 9 <sup>a</sup>     | 1680 $\pm$ 209 <sup>a</sup> |
| Peak Time (min)                  | 6.1 $\pm$ 0.1 <sup>a</sup>    | 6.1 $\pm$ 0.1 <sup>a</sup>  |
| Pasting Temperature (°C)         | 67.6 $\pm$ 0.2 <sup>a</sup>   | 67.4 $\pm$ 0.4 <sup>a</sup> |
